# Supplementary material for: Economic evaluations on centralisation of specialised healthcare services: a systematic review of methods
Source: PubMed Central journal article supplement — BMJ Open. 2016 May 6;6(5):e011214. doi: 10.1136/bmjopen-2016-011214 (PMC4861117; doi:10.1136/bmjopen-2016-011214), 2016-05-06
Supplement: bmjopen-2016-011214supp_tables.pdf [file bmjopen-2016-011214supp_tables.pdf]

**Table S1** Checklist used to assess the methodological quality in included studies

|                                                                                                                                                                                                                                                                                                                          |
|--------------------------------------------------------------------------------------------------------------------------------------------------------------------------------------------------------------------------------------------------------------------------------------------------------------------------|
| 1. Is a clear description of the study objective and comparators provided?                                                                                                                                                                                                                                               |
| 2. Are the characteristics of target population and subgroups described and analysed?                                                                                                                                                                                                                                    |
| 3. Is the setting and location of the study stated?                                                                                                                                                                                                                                                                      |
| 4. Is the study perspective clearly stated?                                                                                                                                                                                                                                                                              |
| 5. Is the time horizon of costs and benefits clear?                                                                                                                                                                                                                                                                      |
| 6. Is the discount rate stated or an explanation is given if costs or benefits are not discounted (where applicable)?                                                                                                                                                                                                    |
| 7. Are the source and methods used to collect effectiveness data described?                                                                                                                                                                                                                                              |
| 8. Are the primary outcome measure(s) for economic evaluation clearly stated?                                                                                                                                                                                                                                            |
| 9. Are the quantities of resources reported separately from their unit costs?                                                                                                                                                                                                                                            |
| 10. Are approaches used to estimate resource use and cost clear?                                                                                                                                                                                                                                                         |
| 11. Are the cost components clearly stated?                                                                                                                                                                                                                                                                              |
| 12. Is the currency/price year explicitly stated?                                                                                                                                                                                                                                                                        |
| 13. Are the analytic methods supporting the evaluation including methods for dealing with skewed, missing, or censored data, extrapolation methods, methods for pooling data, approaches to validate or make adjustments to a model, methods for handling population heterogeneity and uncertainty described in details? |
| 14. Are the incremental costs and outcomes reported (If applicable incremental cost-effectiveness ratios reported)?                                                                                                                                                                                                      |
| 15. Is sensitivity analysis carried out?                                                                                                                                                                                                                                                                                 |
| 16. Are the study limitations discussed?                                                                                                                                                                                                                                                                                 |
| 17. Is the study generalisability discussed?                                                                                                                                                                                                                                                                             |

**Table S2** Basic information on included studies

| Study Reference | Study                                                                                                                                                                                                 | Population sample assessed                                                                                           | Healthcare assessed                              | Alternatives compared                                                                                                         | Costs analysed                                                                                      | Outcomes assessed                                                                                                              |
|-----------------|-------------------------------------------------------------------------------------------------------------------------------------------------------------------------------------------------------|----------------------------------------------------------------------------------------------------------------------|--------------------------------------------------|-------------------------------------------------------------------------------------------------------------------------------|-----------------------------------------------------------------------------------------------------|--------------------------------------------------------------------------------------------------------------------------------|
| 1               | Nallamothu BK, Saint S, Ramsey SD, et al. The role of hospital volume in coronary artery bypass grafting: is more always better? <i>J Am Coll Cardiol</i> 2001;38(7):1923-30.                         | N=13,644 , >35years age, having undergone isolated, non-emergent CABG, mean age=64.5 years                           | Non emergent coronary artery bypass grafting     | Low Vs High volume hospitals                                                                                                  | Direct and indirect hospital costs are said to be included - but cost components not clear          | In-hospital mortality rate, length of hospital stay                                                                            |
| 2               | Dimick JB, Cattaneo SM, Lipsett PA, et al. Hospital volume is related to clinical and economic outcomes of esophageal resection in Maryland. <i>The Annals of Thoracic Surgery</i> 2001;72(2):334-40. | N=1,136, All patients discharged from hospitals with esophageal resection during the study period, mean age=61 years | Esophageal resection                             | High Vs Medium Vs Low volume hospitals                                                                                        | Hospital charges- but cost components not clear                                                     | In-hospital mortality rate, length of hospital stay                                                                            |
| 3               | Lyman S, Jones EC, Bach PB, et al. The association between hospital volume and total shoulder arthroplasty outcomes. <i>Clin Orthop Relat Res</i> 2005(432):132-7.                                    | N=1,307, All patients undergoing elective shoulder arthroplasty during the study period, mean age=65.6 years         | Shoulder arthroplasty                            | High Vs Medium Vs Low volume hospitals                                                                                        | Hospital charges reported on the inpatient bill- but cost components not clear                      | Re-admission rate within 60 days, revision rate within 12 or 24 months, mortality rate within 60 days, length of hospital stay |
| 4               | Bardach NS, Olson SJ, Elkins JS, et al. Regionalization of treatment for subarachnoid hemorrhage: a cost-utility analysis. <i>Circulation</i> 2004;109(18):2207-12.                                   | Base case of 59 year old woman with subarachnoid hemorrhage modelled                                                 | Treatment of Subarachnoid Hemorrhage             | High Vs Low volume hospitals                                                                                                  | Hospital costs, costs of transfer from low volume to high volume hospital, cost of caring disabled, | QALYs                                                                                                                          |
| 5               | Concannon TW, Kent DM, Normand SL, et al. Comparative effectiveness of ST-segment-elevation myocardial infarction regionalization strategies. <i>Circ Cardiovasc Qual Outcomes</i> 2010;3(5):506-13.  | 2000 patients simulated, 55.5-66.6 years mean age in different subgroups                                             | Primary percutaneous coronary intervention (PCI) | Standard care Vs Diverting patients to hospitals with PCI facilities Vs scenarios adding PCI facilities to existing hospitals | Not clear what cost components were analysed                                                        | QALYs                                                                                                                          |

|   |                                                                                                                                                                                                                        |                                                                                          |                                                     |                                                                                                                                                                      |                                                                                                                                                                                                  |                                         |
|---|------------------------------------------------------------------------------------------------------------------------------------------------------------------------------------------------------------------------|------------------------------------------------------------------------------------------|-----------------------------------------------------|----------------------------------------------------------------------------------------------------------------------------------------------------------------------|--------------------------------------------------------------------------------------------------------------------------------------------------------------------------------------------------|-----------------------------------------|
| 6 | Gandjour A, Weyler EJ. Cost-effectiveness of referrals to high-volume hospitals: an analysis based on a probabilistic Markov model for hip fracture surgeries. <i>Health Care Manag Sci</i> 2006; <b>9</b> (4):359-69. | Hypothetical hip fracture patients hospitalized for surgery, mean age=74 years modelled. | Hip fracture surgery                                | High Vs Low volume hospitals                                                                                                                                         | Hospital costs including labor and materials costs for clinical care and ancillary services such as radiology, catering and cleaning; costs of hospital infrastructure, travel costs to hospital | Mortality rate, QALYs                   |
| 7 | Geomini PM, Kruitwagen RF, Bremer GL, et al. Should we centralise care for the patient suspected of having ovarian malignancy? <i>Gynecol Oncol</i> 2011; <b>122</b> (1):95-9.                                         | N=7,598 women who received surgery for an adnexal mass, No mean age reported             | Centralised and regular care for ovarian malignancy | General gynaecologists in a general hospital Vs gynecological oncologist whether or not in a specialised center Vs systematic diagnostic evaluation prior to surgery | Doctors' cost for diagnosis and surgical treatment, salary costs for gynecological oncologist, costs of chemotherapy                                                                             | Life years gained                       |
| 8 | Sutton JM, Wilson GC, Paquette IM, et al. Cost effectiveness after a pancreaticoduodenectomy: bolstering the volume argument. <i>HPB (Oxford)</i> 2014; <b>16</b> (12):1056-61.                                        | N=9883, >18 years age, undergone pancreaticoduodenectomy, modelled                       | Pancreatic surgery                                  | Lowest Vs Low Vs Middle Vs High Vs Highest volume hospitals                                                                                                          | Total direct costs said to be included- but not clear on cost components                                                                                                                         | Post-operative death prior to discharge |
| 9 | Chan T, Kim J, Minich LL, et al. Surgical Volume, Hospital Quality, and Hospitalization Cost in Congenital Heart Surgery in the United States. <i>Pediatric Cardiology</i> 2015; <b>36</b> (1):205-13.                 | N=24,992, <18 years age, underwent congenital cardiac surgery                            | Congenital cardiac surgery                          | High Vs Medium Vs Low volume hospitals                                                                                                                               | Hospital costs but cost components not clear                                                                                                                                                     | Mortality rate, number of complications |

|    |                                                                                                                                                                                                                                  |                                                                                      |                              |                                                           |                                                                                                                                                                                                                   |                       |
|----|----------------------------------------------------------------------------------------------------------------------------------------------------------------------------------------------------------------------------------|--------------------------------------------------------------------------------------|------------------------------|-----------------------------------------------------------|-------------------------------------------------------------------------------------------------------------------------------------------------------------------------------------------------------------------|-----------------------|
| 10 | Hunter RM, Davie C, Rudd A, et al. Impact on Clinical and Cost Outcomes of a Centralized Approach to Acute Stroke Care in London: A Comparative Effectiveness Before and After Model. <i>PLoS ONE</i> 2013; <b>8</b> (8):e70420. | N=3463, had ischemic or hemorrhagic stroke, mean age=71-72.8 years, modelled         | Acute stroke care            | Local hospitals Vs Centralised hyper acute stroke units   | Costs of transport, acute hospitalisation, imaging and surgical interventions, staff contacts and medications during acute hospitalisation and post-discharge care                                                | QALYs, deaths averted |
| 11 | Tanke MAC, Ikkersheim DE. A new approach to the tradeoff between quality and accessibility of health care. <i>Health Policy</i> 2012; <b>105</b> (2-3):282-87.                                                                   | Women undergoing breast cancer treatment- modelled                                   | Breast cancer care           | Local hospitals Vs Centralised hospital                   | Travel costs for patients that stem from centralisation                                                                                                                                                           | QALYs                 |
| 12 | Losina E, Walensky RP, Kessler CL, et al. Cost-effectiveness of total knee arthroplasty in the United States: patient risk and hospital volume. <i>Arch Intern Med</i> 2009; <b>169</b> (12):1113-21; discussion 21-2.           | N=121,432, >65 years with end stage knee Osteoarthritis, modelled                    | Total knee arthroplasty(TKA) | Low Vs Medium Vs High volume hospitals                    | TKA costs-Hospital costs, physician costs, costs of complications, costs of rehabilitation following discharge; Osteoarthritis(OA) cost-Inpatient and ambulatory visits, Knee OA medications, MRIs and radiograms | QALYs                 |
| 13 | Seguin J, Garber BG, Coyle D, et al. An economic evaluation of trauma care in a Canadian lead trauma hospital. <i>J Trauma</i> 1999; <b>47</b> (3 Suppl):S99-103.                                                                | N=484, median age=39 years, trauma admissions with an Injury Severity Score (ISS)>12 | Trauma care                  | Tertiary trauma care center Vs Non trauma center hospital | Direct costs of treatment (e.g. staff, consumables) and indirect costs(e.g. overheads)- cost                                                                                                                      | QALYs                 |

|    |                                                                                                                                                                                                                          |                                                                                                                  |                               |                                                                 |                                                                                                                                                                                                                             |                                                                                                                      |
|----|--------------------------------------------------------------------------------------------------------------------------------------------------------------------------------------------------------------------------|------------------------------------------------------------------------------------------------------------------|-------------------------------|-----------------------------------------------------------------|-----------------------------------------------------------------------------------------------------------------------------------------------------------------------------------------------------------------------------|----------------------------------------------------------------------------------------------------------------------|
|    |                                                                                                                                                                                                                          |                                                                                                                  |                               |                                                                 | component not clear                                                                                                                                                                                                         |                                                                                                                      |
| 14 | MacKenzie EJ, Weir S, Rivara FP, et al. The value of trauma center care. <i>J Trauma</i> 2010; <b>69</b> (1):1-10.                                                                                                       | N=5043, 18-84 years, treated for a moderately severe to severe injury                                            | Trauma care                   | Level I trauma center Vs non trauma center hospital             | Costs associated with-Index hospitalisation, transport, hospital transfers, re-hospitalisation, inpatient rehabilitation, stays in long term care, nursing facilities, outpatient care, informal care by friends and family | Incremental lives saved, incremental life years gained, incremental QALY gained                                      |
| 15 | Tsao SY, Lee WC, Loong CC, et al. High-surgical-volume hospitals associated with better quality and lower cost of kidney transplantation in Taiwan. <i>J Chin Med Assoc</i> 2011; <b>74</b> (1):22-7.                    | N=1060, >18 years of age, patients with kidney transplants                                                       | Kidney transplantation        | High Vs Low volume hospitals                                    | Total medical cost of the transplant, annual medical cost for 3 years after the transplant                                                                                                                                  | Complications- infection, mortality, readmission in 14 days, patient survival at 1,2, and 3 years of transplantation |
| 16 | Yoshioka R, Yasunaga H, Hasegawa K, et al. Impact of hospital volume on hospital mortality, length of stay and total costs after pancreaticoduodenectomy. <i>British Journal of Surgery</i> 2014; <b>101</b> (5):523-29. | N=10652, mean age=67.3 years, patients undergoing pancreaticoduodenectomy                                        | Pancreatic surgery            | Very high Vs High Vs Medium Vs Low Vs Very low volume hospitals | Costs of surgical, pharmaceutical, laboratory and other inpatient services- but cost components not clear                                                                                                                   | Post-operative mortality, length of hospital stay                                                                    |
| 17 | Joynt KE, Orav EJ, Jha AK. The association between hospital volume and processes, outcomes, and costs of care for congestive heart failure. <i>Ann Intern Med</i> 2011; <b>154</b> (2):94-102.                           | N=1,029,497, median age=80 years, patients >65 years of age with discharge diagnosis of congestive heart failure | Congestive heart failure care | High Vs Medium Vs Low volume hospitals                          | No clear information on cost                                                                                                                                                                                                | Mortality, readmission rates                                                                                         |

|    |                                                                                                                                                                                                                               |                                                                                                                                                        |                                                                                                                     |                                        |                                                                                                                                                                                                                                                                                        |                                                                                                                                 |
|----|-------------------------------------------------------------------------------------------------------------------------------------------------------------------------------------------------------------------------------|--------------------------------------------------------------------------------------------------------------------------------------------------------|---------------------------------------------------------------------------------------------------------------------|----------------------------------------|----------------------------------------------------------------------------------------------------------------------------------------------------------------------------------------------------------------------------------------------------------------------------------------|---------------------------------------------------------------------------------------------------------------------------------|
| 18 | Ellison LM, Heaney JA, Birkmeyer JD. The effect of hospital volume on mortality and resource use after radical prostatectomy. <i>J Urol</i> 2000; <b>163</b> (3):867-9.                                                       | N=66,693 men, mean age= 65 years, patients undergoing radical prostatectomy                                                                            | Radical prostatectomy                                                                                               | High Vs Low volume hospitals           | Hospital charges- but no clear information on cost components                                                                                                                                                                                                                          | In-hospital mortality, length of hospital stay                                                                                  |
| 19 | Nathan H, Atoria CL, Bach PB, et al. Hospital Volume, Complications, and Cost of Cancer Surgery in the Elderly. <i>Journal of Clinical Oncology</i> 2014                                                                      | N=60,361, >66 years of age, patients diagnosed with cancer of the bladder, colon, lung, pancreas, prostate, or rectum and undergone surgical resection | Cancer surgery- included colectomy, cystectomy, pancreatectomy, proctectomy, prostatectomy, and pulmonary lobectomy | High Vs Mid Vs Low volume hospitals    | Medicare payments for diagnosis related group, index hospitalisation and readmissions within 30 days from discharge; home health agencies, rehabilitation hospital, skilled nursing facilities in the corresponding 30 days after discharge. However unit costs of each not presented. | Post-operative patient outcomes- mortality, complications, readmissions, and emergency room visits within 30 days after surgery |
| 20 | Sosa JA, Bowman HM, Gordon TA, et al. Importance of hospital volume in the overall management of pancreatic cancer. <i>Ann Surg</i> 1998; <b>228</b> (3):429-38.                                                              | N=1236, mean age=67 years, patients with pancreatic cancer and undergoing a primary treatment procedure                                                | Palliative procedures and curative surgery for pancreatic cancer                                                    | High Vs Medium Vs Low volume hospitals | Hospital charges- but not clear on its components                                                                                                                                                                                                                                      | In-hospital mortality rate, length of hospital stay,                                                                            |
| 21 | Mitsuyasu S, Hagihara A, Horiguchi H, et al. Relationship Between Total Arthroplasty Case Volume and Patient Outcome in an Acute Care Payment System in Japan. <i>The Journal of Arthroplasty</i> 2006; <b>21</b> (5):656-63. | N=1561, mean age=69.8 years, patients who had undergone joint arthroplasty                                                                             | Total Arthroplasty                                                                                                  | High Vs Low volume hospitals           | Hospital costs- but not clear on its components                                                                                                                                                                                                                                        | Length of hospital stay                                                                                                         |

|    |                                                                                                                                                                                                              |                                                                                                                 |                                                         |                                                                                                                                                                     |                                                    |                                                                          |
|----|--------------------------------------------------------------------------------------------------------------------------------------------------------------------------------------------------------------|-----------------------------------------------------------------------------------------------------------------|---------------------------------------------------------|---------------------------------------------------------------------------------------------------------------------------------------------------------------------|----------------------------------------------------|--------------------------------------------------------------------------|
| 22 | Swisher SG, Deford L, Merriman KW, et al. Effect of operative volume on morbidity, mortality, and hospital use after esophagectomy for cancer. <i>J Thorac Cardiovasc Surg</i> 2000; <b>119</b> (6):1126-32. | N=340, age not specified, patients who underwent esophageal resection for cancer                                | Esophagectomy                                           | High Vs Low volume; Cancer Specialised Vs Community hospitals                                                                                                       | Hospital charge- but not clear on its components   | Operative mortality, complications of care                               |
| 23 | Gordon TA, Burleyson GP, Tielsch JM, et al. The effects of regionalization on cost and outcome for one general high-risk surgical procedure. <i>Ann Surg</i> 1995; <b>221</b> (1):43-9.                      | N=502, mean age=62 years, patients undergone pancreaticoduodenectomies                                          | Pancreatic surgery                                      | High volume regional hospital Vs numerous lower-volume hospitals                                                                                                    | Hospital charges- but not clear on its components  | In-hospital mortality, length of ICU and hospital stay                   |
| 24 | Yu HY, Hevelone ND, Patel S, et al. Hospital surgical volume, utilization, costs and outcomes of retroperitoneal lymph node dissection for testis cancer. <i>Adv Urol</i> 2012; <b>2012</b> :189823.         | N=993, >18 years of age, undergone retroperitoneal lymph node dissection for testis cancer, mean age=30.9 years | Retroperitoneal lymph node dissection for testis cancer | High Vs Low volume hospitals                                                                                                                                        | Inpatient charges- but not clear on its components | Mortality, Length of hospital stay,                                      |
| 25 | Glasgow RE, Mulvihill SJ. Hospital volume influences outcome in patients undergoing pancreatic resection for cancer. <i>West J Med</i> 1996; <b>165</b> (5):294-300.                                         | N=1705, median age=65 years (range 2-85 years), patients undergoing pancreatic resection                        | Pancreatic resection                                    | Comparison of several different volume hospitals                                                                                                                    | Hospital charges- but not clear on its components  | Operative mortality, Length of hospital stay, patient discharged to home |
| 26 | Dimick JB, Pronovost PJ, Lipsett PA. The Effect of ICU Physician Staffing and Hospital Volume on Outcomes After Hepatic Resection. <i>Journal of Intensive Care Medicine</i> 2002; <b>17</b> (1):41-47.      | N=569, >18 years of age, having primary procedure code for hepatectomy; mean age=57 years,                      | Managing Hepatic resection                              | ICU physician rounds and no ICU physician rounds in High Vs Low volume hospitals, High Vs Low volume surgeons, (only hospital volume was considered in this review) | Hospital charges- but not clear on its components  | In-hospital mortality, length of hospital stay                           |
| 27 | Slover JD, Tosteson AN, Bozic KJ, et al. Impact of hospital volume on the economic value of computer                                                                                                         | Hypothetical cohort of 65 year old patients with end-                                                           | Computer assisted surgery in end-stage                  | Conventional total knee replacement without computer                                                                                                                | Reimbursement costs of primary and revision total  | QALYs, revision rates                                                    |

|    |                                                                                                                                                                                                                                                        |                                                                                                                     |                                                    |                                                                                   |                                                                                                                                                                       |                                                                                                            |
|----|--------------------------------------------------------------------------------------------------------------------------------------------------------------------------------------------------------------------------------------------------------|---------------------------------------------------------------------------------------------------------------------|----------------------------------------------------|-----------------------------------------------------------------------------------|-----------------------------------------------------------------------------------------------------------------------------------------------------------------------|------------------------------------------------------------------------------------------------------------|
|    | navigation for total knee replacement. <i>J Bone Joint Surg Am</i> 2008; <b>90</b> (7):1492-500.                                                                                                                                                       | stage arthritis of the knee were modelled.                                                                          | arthritis of the knee                              | navigation and computer assisted surgery compared in high vs low volume hospitals | knee replacement and computer navigation including cost of computer software and service contract- no information on breakdown of unit costs and resource consumption |                                                                                                            |
| 28 | Nguyen NT, Paya M, Stevens CM, et al. The relationship between hospital volume and outcome in bariatric surgery at academic medical centers. <i>Ann Surg</i> 2004; <b>240</b> (4):586-93; discussion 93-4.                                             | N=24,166, patients who underwent Roux-en-Y gastric bypass for the treatment of morbid obesity, No age restrictions, | Bariatric surgery                                  | High Vs Medium Vs Low volume hospitals                                            | Not clear- but appears to be cost of surgery                                                                                                                          | Perioperative outcomes- length of hospital stay, complications, readmissions; In-hospital mortality        |
| 29 | Vogel TR, Dombrovskiy VY, Graham AM, et al. The impact of hospital volume on the development of infectious complications after elective abdominal aortic surgery in the Medicare population. <i>Vasc Endovascular Surg</i> 2011; <b>45</b> (4):317-24. | N=59365 elective aortic surgery procedures, >65 years of age with nonruptured abdominal aortic aneurysms            | Elective aortic surgery                            | High Vs Low volume hospitals                                                      | Hospital charges- but not clear on its components                                                                                                                     | In-hospital mortality, postoperative infectious complications, length of ICU stay, length of hospital stay |
| 30 | Ananthkrishnan AN, McGinley EL, Saeian K. Higher hospital volume is associated with lower mortality in acute nonvariceal upper-GI hemorrhage. <i>Gastrointest Endosc</i> 2009; <b>70</b> (3):422-32.                                                   | N=391,119 discharges with a primary diagnosis of nonvariceal upper-GI hemorrhage, >18 years of age                  | Treatment of acute nonvariceal upper-GI hemorrhage | High Vs Medium Vs Low volume hospitals                                            | Hospital charges- but components not clear                                                                                                                            | In-hospital mortality, length of hospital stay                                                             |
| 31 | Simpson AN, Wardrope J, Burke D. The Sheffield experiment: the effects of centralising accident and emergency services in a large                                                                                                                      | N=371,293 annual new patient attendances analysed                                                                   | Centralisation of accident and emergency services  | Before centralisation Vs after centralisation                                     | The cost of A&E services as a whole, the cost per case in the A&E; do not include                                                                                     | Quality of patient care in terms of time to see a doctor or nurse practitioner, time to admission          |



|    |                                                                                                                                                                                            |                                                                                                       |                                              |                                                  |                                                                                               |                                                |
|----|--------------------------------------------------------------------------------------------------------------------------------------------------------------------------------------------|-------------------------------------------------------------------------------------------------------|----------------------------------------------|--------------------------------------------------|-----------------------------------------------------------------------------------------------|------------------------------------------------|
|    | urban setting. <i>Emergency Medicine Journal</i> 2001; <b>18</b> (3):193-97.                                                                                                               |                                                                                                       |                                              |                                                  | capital expenditure generated by building works/equipment costs as a result of centralisation |                                                |
| 32 | Shen HN, Lu CL, Li CY. The effect of hospital volume on patient outcomes in severe acute pancreatitis. <i>BMC Gastroenterol</i> 2012; <b>12</b> :112.                                      | N=22,551 patients with severe acute pancreatitis, age range (38-73) years                             | Treatment of severe acute pancreatitis       | Comparison of several different volume quartiles | Hospital charges- but components not clear                                                    | Hospital mortality, length of hospital stay    |
| 33 | Singla A, Simons J, Li Y, et al. Admission Volume Determines Outcome for Patients With Acute Pancreatitis. <i>Gastroenterology</i> 2009; <b>137</b> (6):1995-2001.                         | N=416, 489, >18 years of age patients with primary diagnosis of acute pancreatitis, mean age=53 years | Treatment of acute pancreatitis              | High Vs Low volume hospitals                     | Hospital charges- but components not clear                                                    | In-hospital mortality, length of hospital stay |
| 34 | Koo JJ, Wang J, Thompson CB, et al. Impact of Hospital Volume and Specialization on the Cost of Orbital Trauma Care. <i>Ophthalmology</i> 2013; <b>120</b> (12):2741-46.                   | N=499, patients who underwent orbital reconstruction, mean age=34 years (range 3-94)                  | Orbital trauma care                          | Specialised eye trauma center Vs Local hospitals | Hospital charges- but components not clear                                                    | Readmission, length of hospital stay           |
| 35 | Gordon TA, Bowman HM, Bass EB, et al. Complex gastrointestinal surgery: impact of provider experience on clinical and economic outcomes. <i>J Am Coll Surg</i> 1999; <b>189</b> (1):46-56. | N=4,561, patients discharged after complex gastrointestinal surgical procedures, mean age=61.6 years  | Complex gastrointestinal surgical procedures | High Vs Medium Vs Low volume hospitals           | Hospital charges- but components not clear                                                    | In-hospital mortality, length of hospital stay |
| 36 | Choti MA, Bowman HM, Pitt HA, et al. Should hepatic resections be performed at high-volume referral centers? <i>J Gastrointest Surg</i> 1998; <b>2</b> (1):11-20.                          | N=606, patients undergone hepatic resection, mean age=54.8 years                                      | Hepatic resections                           | High Vs Low volume hospitals                     | Hospital charges- but components not clear                                                    | In-hospital mortality, length of hospital stay |
| 37 | Harmon JW, Tang DG, Gordon TA, et al. Hospital volume can serve as a surrogate for surgeon volume for                                                                                      | N=9739, >18 years of age, patients who underwent                                                      | Colorectal resections                        | High Vs Medium Vs Low volume hospitals and       | Hospital charges- but components not clear                                                    | In-hospital mortality, length of hospital stay |

|    |                                                                                                                                                                                                           |                                                                                                  |                              |                                                                                                      |                                                                                                                            |                                                                                             |
|----|-----------------------------------------------------------------------------------------------------------------------------------------------------------------------------------------------------------|--------------------------------------------------------------------------------------------------|------------------------------|------------------------------------------------------------------------------------------------------|----------------------------------------------------------------------------------------------------------------------------|---------------------------------------------------------------------------------------------|
|    | achieving excellent outcomes in colorectal resection. <i>Ann Surg</i> 1999; <b>230</b> (3):404-11; discussion 11-3.                                                                                       | colorectal section as the primary procedure, mean age=69.2 years                                 |                              | surgeons (but surgeons not included in this review)                                                  |                                                                                                                            |                                                                                             |
| 38 | Díaz-Montes TP, Zahurak ML, Giuntoli RL, et al. Concentration of uterine cancer surgical care among the elderly: A population-based perspective. <i>Gynecologic Oncology</i> 2007; <b>107</b> (3):436-40. | N=6181, >18 years of age women with primary surgical procedure for a malignant uterine neoplasm, | Uterine cancer surgical care | High Vs Low volume hospitals and surgeons (but surgeons not included in this review)                 | Hospital costs- but components not clear                                                                                   | Peri-operative mortality rates, length of hospital stay, length of ICU stay                 |
| 39 | Wright JD, Hershman DL, Burke WM, et al. Influence of surgical volume on outcome for laparoscopic hysterectomy for endometrial cancer. <i>Ann Surg Oncol</i> 2012; <b>19</b> (3):948-58.                  | N=4,137, women who underwent laparoscopic hysterectomy for endometrial cancer                    | Laparoscopic hysterectomy    | High Vs Intermediate Vs Low volume hospitals and surgeons (but surgeons not included in this review) | Hospital costs-but components not clear                                                                                    | Perioperative morbidity and mortality, length of hospital stay, readmissions within 60 days |
| 40 | Diaz-Montes TP, Giuntoli RL. Volume-Based Care among Young Women Diagnosed with Uterine Cancer. <i>ISRN Surg</i> 2011; <b>2011</b> :541461.                                                               | N=6,181, >18 years of age women with primary surgical procedure for a malignant uterine neoplasm | Caring uterine cancer        | High Vs Low volume hospitals and surgeons (but surgeons not included in this review)                 | Hospital costs- but components not clear                                                                                   | Length of hospital stay, length of ICU stay, in-hospital mortality                          |
| 41 | Lee JA, Park JH, Lee EJ, et al. High-quality, low-cost gastrectomy care at high-volume hospitals: results from a population-based study in South Korea. <i>Arch Surg</i> 2011; <b>146</b> (8):930-6.      | N=48,938, patient undergoing gastrectomy, mean age=58 years                                      | Gastrectomy care             | Very high Vs high Vs Very low Vs Low volume hospitals                                                | Hospital costs-but components not clear                                                                                    | Length of hospital stay, standard mortality ratio                                           |
| 42 | Tsugawa Y, Kumamaru H, Yasunaga H, et al. The association of hospital volume with mortality and costs of care for stroke in Japan. <i>Med Care</i> 2013; <b>51</b> (9):782-8.                             | N=66,406, primary admission diagnosis of stroke,                                                 | Stroke care                  | High Vs Medium Vs Low volume hospitals                                                               | Total costs of hospital care- costs components broken down into: costs of oral medications, injectables, surgical and non- | In-hospital mortality                                                                       |

|    |                                                                                                                                                                                                                                                    |                                                                                                                            |                                       |                                                                                                |                                                                                                                          |                                                                         |
|----|----------------------------------------------------------------------------------------------------------------------------------------------------------------------------------------------------------------------------------------------------|----------------------------------------------------------------------------------------------------------------------------|---------------------------------------|------------------------------------------------------------------------------------------------|--------------------------------------------------------------------------------------------------------------------------|-------------------------------------------------------------------------|
|    |                                                                                                                                                                                                                                                    |                                                                                                                            |                                       |                                                                                                | surgical procedures, tests, imaging studies                                                                              |                                                                         |
| 43 | Chiu CC, Wang JJ, Tsai TC, et al. The relationship between volume and outcome after bariatric surgery: a nationwide study in Taiwan. <i>Obes Surg</i> 2012; <b>22</b> (7):1008-15.                                                                 | N=2,674, >18 years of age patients who had undergone bariatric surgery, mean age=32.21 years                               | Bariatric surgery                     | High Vs Low volume hospitals and surgeons (but surgeons not included in this review)           | Hospital treatment cost-but components not clear                                                                         | Length of hospital stay                                                 |
| 44 | Safford SD, Pietrobon R, Safford KM, et al. A study of 11,003 patients with hypertrophic pyloric stenosis and the association between surgeon and hospital volume and outcomes. <i>J Pediatr Surg</i> 2005; <b>40</b> (6):967-72; discussion 72-3. | N=11,003, children with hypertrophic pyloric stenosis, mean age=41.1 days                                                  | Hypertrophic pyloric stenosis surgery | High Vs Medium Vs Low volume hospitals and surgeons (but surgeons not included in this review) | Cost components not clear                                                                                                | Length of hospital stay, complications, mortality                       |
| 45 | Long DM, Gordon T, Bowman H, et al. Outcome and cost of craniotomy performed to treat tumors in regional academic referral centers. <i>Neurosurgery</i> 2003; <b>52</b> (5):1056-63; discussion 63-5.                                              | N= 4,723, patient undergoing a craniotomy for a benign tumor, primary or secondary malignant neoplasm, mean age=54.5 years | Craniotomy                            | High Vs Low volume hospitals                                                                   | Hospitals charges-but components not clear                                                                               | In-hospital mortality, length of hospital stay                          |
| 46 | Clement RC, Carr BG, Kallan MJ, et al. Volume-outcome relationship in neurotrauma care. <i>J Neurosurg</i> 2013; <b>118</b> (3):687-93.                                                                                                            | N=61,067, patient with neurological trauma                                                                                 | Neurotrauma care                      | Several different volume hospitals                                                             | Hospital costs-but components not clear                                                                                  | Mortality, length of hospital stay, poor outcomes (not clearly defined) |
| 47 | Hamada T, Yasunaga H, Nakai Y, et al. Impact of hospital volume on outcomes in acute pancreatitis: a study using a nationwide administrative database. <i>J Gastroenterol</i> 2014; <b>49</b> (1):148-55.                                          | N=17,415, >20 years age patients with acute pancreatitis, mean age=61.1 years                                              | Acute pancreatitis care               | High Vs Low volume hospitals                                                                   | Hospital costs-reported the inclusion of item by item price for surgical, pharmaceutical, laboratory and other inpatient | In-hospital mortality, length of hospital stay                          |

|    |                                                                                                                                                                                                              |                                                                                                          |                                    |                                                                                            |                                                                                                                                                                                                                      |                                                              |
|----|--------------------------------------------------------------------------------------------------------------------------------------------------------------------------------------------------------------|----------------------------------------------------------------------------------------------------------|------------------------------------|--------------------------------------------------------------------------------------------|----------------------------------------------------------------------------------------------------------------------------------------------------------------------------------------------------------------------|--------------------------------------------------------------|
|    |                                                                                                                                                                                                              |                                                                                                          |                                    |                                                                                            | services, however cost details not provided                                                                                                                                                                          |                                                              |
| 48 | Gutierrez B, Culler SD, Freund DA. Does hospital procedure-specific volume affect treatment costs? A national study of knee replacement surgery. <i>Health Serv Res</i> 1998; <b>33</b> (3 Pt 1):489-511.    | N=67,041 patient hospitalisation in which knee replacement surgery had been performed, mean age=74 years | Knee replacement surgery           | High Vs Medium Vs Low volume hospitals                                                     | Hospital costs-but components not clear                                                                                                                                                                              | Mortality, complications                                     |
| 49 | Auerbach AD, Hilton JF, Maselli J, et al. Case volume, quality of care, and care efficiency in coronary artery bypass surgery. <i>Arch Intern Med</i> 2010; <b>170</b> (14):1202-8.                          | N=81,289 patients who underwent coronary artery bypass surgery, mean age=65 years                        | Coronary artery bypass surgery     | Several volume quartiles hospitals and surgeons (but surgeons not included in this review) | Hospital costs-but components not clear                                                                                                                                                                              | Length of hospital stay, care quality                        |
| 50 | Gourin CG, Forastiere AA, Sanguineti G, et al. Impact of surgeon and hospital volume on short-term outcomes and cost of oropharyngeal cancer surgical care. <i>Laryngoscope</i> 2011; <b>121</b> (4):746-52. | N=1,534, >18 years of age patients with a diagnosis of oropharyngeal cancer, mean age=58.3 years         | Oropharyngeal cancer surgical care | High Vs low volume hospitals and surgeons (but surgeons not included in this review)       | Hospital costs-but components not clear                                                                                                                                                                              | In-hospital mortality, length of hospital stay, readmissions |
| 51 | Lu CC, Chiu CC, Wang JJ, et al. Volume-outcome associations after major hepatectomy for hepatocellular carcinoma: a nationwide Taiwan study. <i>J Gastrointest Surg</i> 2014; <b>18</b> (6):1138-45.         | N=23,107, patients undergone major hepatectomy for hepatocellular carcinoma, mean age=58.1 years         | Major Hepatectomy                  | High Vs Low volume hospitals and surgeons (but surgeons not included in this review)       | Hospital costs-reported inclusion of cost of operating room, radiology, physical therapy, hospital room, anesthetist, pharmacy, laboratory, special materials, surgeon and others, however cost details not provided | Length of hospital stay, survival                            |
| 52 | Macomber CW, Shaw JJ, Santry H, et al. Centre volume and resource consumption in liver                                                                                                                       | N=5310, patients who underwent liver                                                                     | Liver transplantation              | High Vs Medium Vs Low volume hospitals                                                     | Reported as directed costs of transplant-but cost                                                                                                                                                                    | Mortality, Transplant to length of hospital                  |

|    |                                                                                                                                                                                                    |                                                                                                                                        |                                    |                                                                                                                                            |                                                                                                                                                                                                                      |                                                                                                          |
|----|----------------------------------------------------------------------------------------------------------------------------------------------------------------------------------------------------|----------------------------------------------------------------------------------------------------------------------------------------|------------------------------------|--------------------------------------------------------------------------------------------------------------------------------------------|----------------------------------------------------------------------------------------------------------------------------------------------------------------------------------------------------------------------|----------------------------------------------------------------------------------------------------------|
|    | transplantation. <i>HPB (Oxford)</i> 2012; <b>14</b> (8):554-9.                                                                                                                                    | transplants, age range:18-81 years                                                                                                     |                                    |                                                                                                                                            | components not clear                                                                                                                                                                                                 | stay, ICU length of stay                                                                                 |
| 53 | Kuo EY, Chang Y, Wright CD. Impact of hospital volume on clinical and economic outcomes for esophagectomy. <i>Ann Thorac Surg</i> 2001; <b>72</b> (4):1118-24.                                     | N=1,193, patients who underwent esophagectomy, mean age=64.3 years                                                                     | Esophagectomy                      | High Vs Low volume hospitals                                                                                                               | Hospital costs-but components not clear                                                                                                                                                                              | Length of hospital stay, length of ICU stay, In-hospital mortality, discharge destination                |
| 54 | Bristow RE, Santillan A, Diaz-Montes TP, et al. Centralisation of care for patients with advanced-stage ovarian cancer: a cost-effectiveness analysis. <i>Cancer</i> 2007; <b>109</b> (8):1513-22. | Hypothetical cohort of women with advanced-stage ovarian cancer-modelled                                                               | Advanced-stage ovarian cancer care | Expert center Vs Less experienced center                                                                                                   | Direct costs-costs of primary surgery, chemotherapy regimens, hospitalisation costs for treatment related toxicity<br>Indirect costs- cost of lost productivity, care giver support. Cost components clearly stated. | QALYs                                                                                                    |
| 55 | Greving JP, Vernooij F, Heintz AP, et al. Is centralisation of ovarian cancer care warranted? A cost-effectiveness analysis. <i>Gynecol Oncol</i> 2009; <b>113</b> (1):68-74.                      | N=879 ,Hypothetical cohort of women with ovarian cancer and a mean age of 63 years                                                     | Ovarian cancer care                | General Vs Semi-specialised Vs Tertiary hospitals                                                                                          | Direct costs and included- personnel costs, operating room costs, costs of follow up monitoring and treatment. Indirect costs were not included.                                                                     | QALYs, overall survival                                                                                  |
| 56 | Fader DJ, Wise CG, Normolle DP, et al. The multidisciplinary melanoma clinic: a cost outcomes analysis of specialty care. <i>J Am Acad Dermatol</i> 1998; <b>38</b> (5 Pt 1):742-51.               | N=208 for cost analysis, N=954 for long term survival, patients with melanoma (study suffers from a fragmented effectiveness analyses) | Melanoma care                      | All treatment at Multi-disciplinary Melanoma Clinic Vs Traditional strategy of treating patients referred by physicians for second opinion | Direct costs- costs of office visits/consultations, surgeries, radiology, medical tests, laboratories, pathology, facility and anesthesia included. Indirect                                                         | Short term outcomes- surgical morbidity, length of hospital stay<br>Long term outcomes – 5 year survival |

|    |                                                                                                                                                                                                                                                      |                                                                                                                                                                                             |                                                                                                            |                                                                                                  |                                                                                                                          |                                                                                 |
|----|------------------------------------------------------------------------------------------------------------------------------------------------------------------------------------------------------------------------------------------------------|---------------------------------------------------------------------------------------------------------------------------------------------------------------------------------------------|------------------------------------------------------------------------------------------------------------|--------------------------------------------------------------------------------------------------|--------------------------------------------------------------------------------------------------------------------------|---------------------------------------------------------------------------------|
|    |                                                                                                                                                                                                                                                      |                                                                                                                                                                                             |                                                                                                            |                                                                                                  | costs were not considered.                                                                                               |                                                                                 |
| 57 | Regenbogen SE, Gust C, Birkmeyer JD. Hospital Surgical Volume and Cost of Inpatient Surgery in the Elderly. <i>Journal of the American College of Surgeons</i> 2012; <b>215</b> (6):758-65.                                                          | N=101,349, Patients undergoing coronary artery bypass grafting, elective abdominal aortic aneurysm, or colectomy; older than 65 years and younger than 99 years of age; mean age=78.4 years | Inpatient operations for colectomy, coronary artery bypass grafting and elective abdominal aortic aneurysm | Several volume quintiles hospitals                                                               | Hospital costs- included costs of index hospitalization, readmissions, physician services, post-discharge ancillary care | Complication, mortality                                                         |
| 58 | Avritscher EB, Cooksley CD, Rolston KV, et al. Serious postoperative infections following resection of common solid tumors: outcomes, costs, and impact of hospital surgical volume. <i>Support Care Cancer</i> 2014; <b>22</b> (2):527-35.          | N=37,582, >75 years of age patients who underwent resection of cancer of the lung, esophagus, stomach, pancreas, colon, or rectum;                                                          | Resection of common surgical tumors                                                                        | High Vs Intermediate Vs Low volume hospitals                                                     | Hospital costs-but cost components not clear                                                                             | Serious postoperative infection, length of hospital stay, In-hospital mortality |
| 59 | Kilic A, Shah AS, Conte JV, et al. Operative outcomes in mitral valve surgery: Combined effect of surgeon and hospital volume in a population-based analysis. <i>The Journal of Thoracic and Cardiovascular Surgery</i> 2013; <b>146</b> (3):638-46. | N=50,152, patients undergoing isolated mitral valve surgery for mitral regurgitation, mean age=61.9 years                                                                                   | Mitral valve surgery                                                                                       | High Vs Intermediate Vs Low volume hospitals and surgeons (surgeons not included in this review) | Hospital costs- but cost components not clear                                                                            | Operative mortality, mitral valve repair rate                                   |
| 60 | Sutton JM, Hoehn RS, Ertel AE, et al. Cost-Effectiveness in Hepatic Lobectomy: the Effect of Case Volume on Mortality, Readmission, and Cost of Care. <i>Journal of Gastrointestinal Surgery</i> 2015; <b>20</b> (2):253-61.                         | N= 4163, >18 years of age patients who underwent hepatic lobectomy, mean age= 58 years,                                                                                                     | Hepatic lobectomy                                                                                          | High Vs Medium Vs Low volume hospitals                                                           | Hospital costs- but components not clear                                                                                 | Peri-operative mortality, Readmissions                                          |

|    |                                                                                                                                                                                                                                                                  |                                                                                            |                                       |                                                                                |                                           |                                                         |
|----|------------------------------------------------------------------------------------------------------------------------------------------------------------------------------------------------------------------------------------------------------------------|--------------------------------------------------------------------------------------------|---------------------------------------|--------------------------------------------------------------------------------|-------------------------------------------|---------------------------------------------------------|
| 61 | Kim A, Yoon SJ, Kim YA, et al. The burden of acute myocardial infarction after a regional cardiovascular center project in Korea. <i>Int J Qual Health Care</i> 2015; <b>27</b> (5):349-55.                                                                      | N=1469 in each of the two regions, >18 years age patients with acute myocardial infarction | Acute myocardial infarction care      | Before regionalisation Vs After regionalisation                                | Hospital costs-but components not clear   | Length of stay                                          |
| 62 | Arora S, Panaich SS, Patel N, et al. Impact of Hospital Volume on Outcomes of Lower Extremity Endovascular Interventions (Insights from the Nationwide Inpatient Sample [2006 to 2011]). <i>The American Journal of Cardiology</i> 2015; <b>116</b> (5):791-800. | N=92,714, >18 years of age patients undergoing peripheral endovascular interventions       | Peripheral endovascular interventions | Several volume quartiles hospitals                                             | Hospital costs-but components not clear   | In-hospital mortality and peri-procedural complications |
| 63 | Wakeam E, Hyder JA, Lipsitz SR, et al. Outcomes and Costs for Major Lung Resection in the United States: Which Patients Benefit Most From High-Volume Referral? <i>The Annals of Thoracic Surgery</i> 2015; <b>100</b> (3):939-46.                               | N= 37,746, >18 years of age patients who underwent a major lung resection                  | Major lung resection                  | Very high Vs High Vs Moderate Vs Low volume hospitals according to risk groups | Inpatient costs- but components not clear | In-hospital mortality                                   |
| 64 | Bhatt P, Patel NJ, Patel A, et al. Impact of Hospital Volume on Outcomes of Endovascular Stenting for Adult Aortic Coarctation. <i>The American Journal of Cardiology</i> 2015; <b>116</b> (9):1418-24.                                                          | N=105, >18 years of age patients with coarctation of aorta, mean age= 36.9 years,          | Treatment of coarctation of aorta     | High Vs Low volume hospitals                                                   | Hospital costs- but components not clear  | Length of stay, complications                           |

QALYs= Quality Adjusted Life Years; ICU= Intensive Care Unit
